# Supplementary material for: Comprehensive analysis of lncRNA expression profiles and identification of functional lncRNAs in lung adenocarcinoma
Source: PubMed Central journal article supplement (PMC4941294; doi:10.18632/oncotarget.7559), 2016-02-21
Supplement: oncotarget-07-16012-s001.pdf [file oncotarget-07-16012-s001.pdf]

# Comprehensive analysis of lncRNA expression profiles and identification of functional lncRNAs in lung adenocarcinoma

## Supplementary Materials

**Table S1.** Probe sets mapped to lncRNAs

**Table S2.** 856 differentially expressed lncRNAs identified

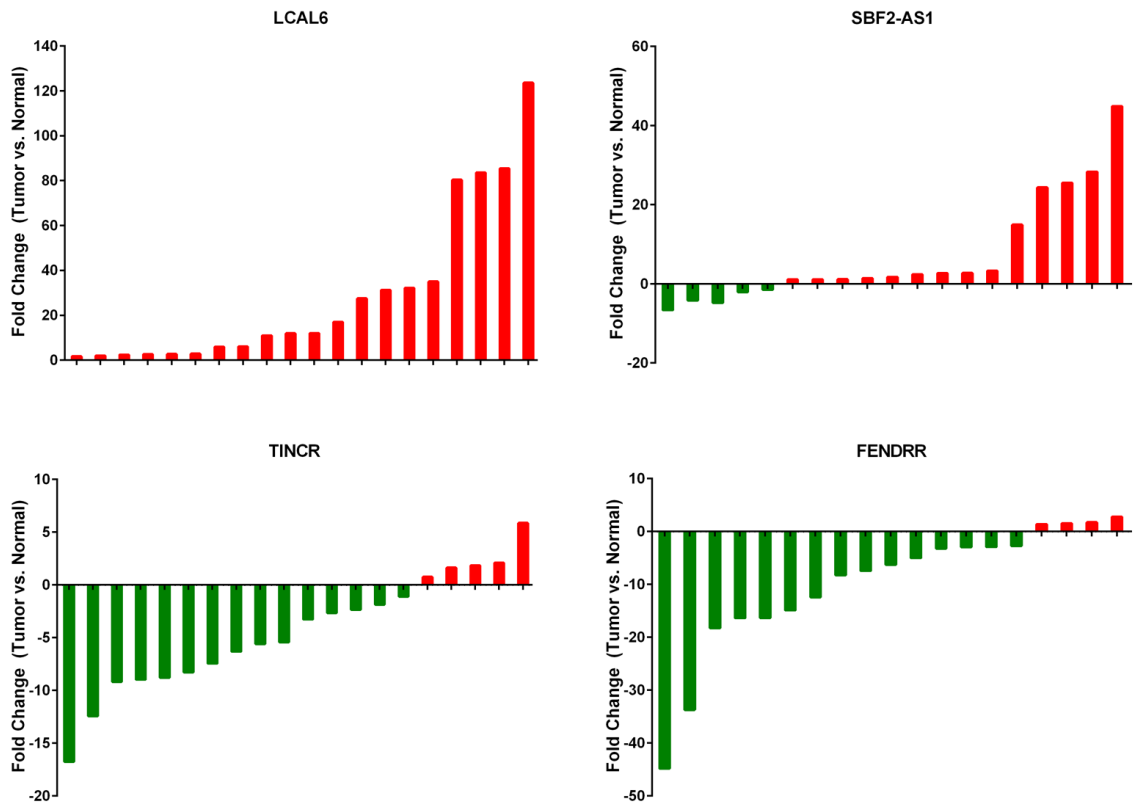

**Figure S3.** Four lncRNAs were validated by qRT-PCR and regulation patterns of the 4 lncRNAs were consistent with our analyses results.

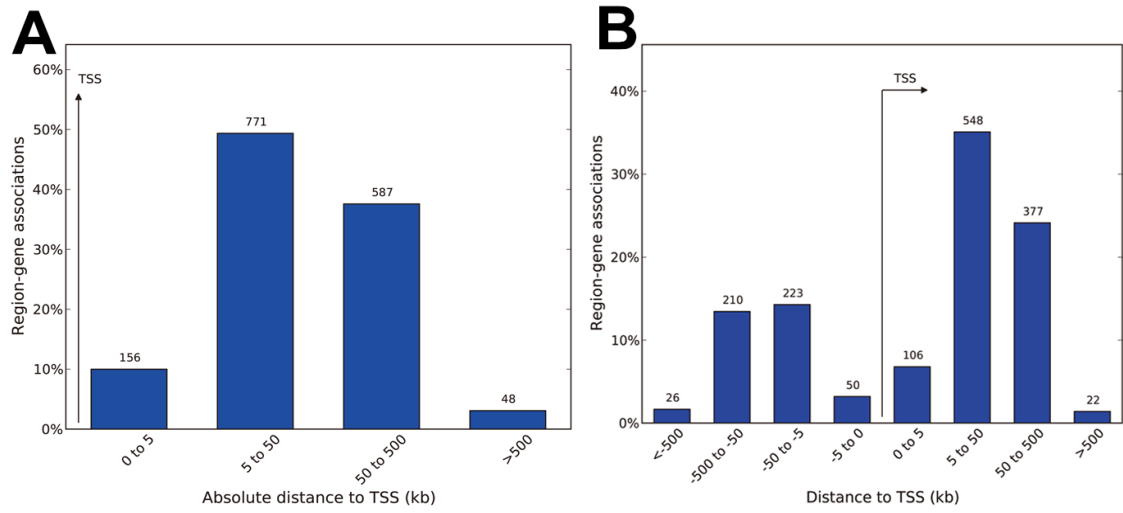

**Figure S4.** GREAT analysis of the 856 lncRNAs and these lncRNAs are located nearby transcription start sites (A, B).

**Table S5.** 20 lncRNAs both in our analysis and LCALs

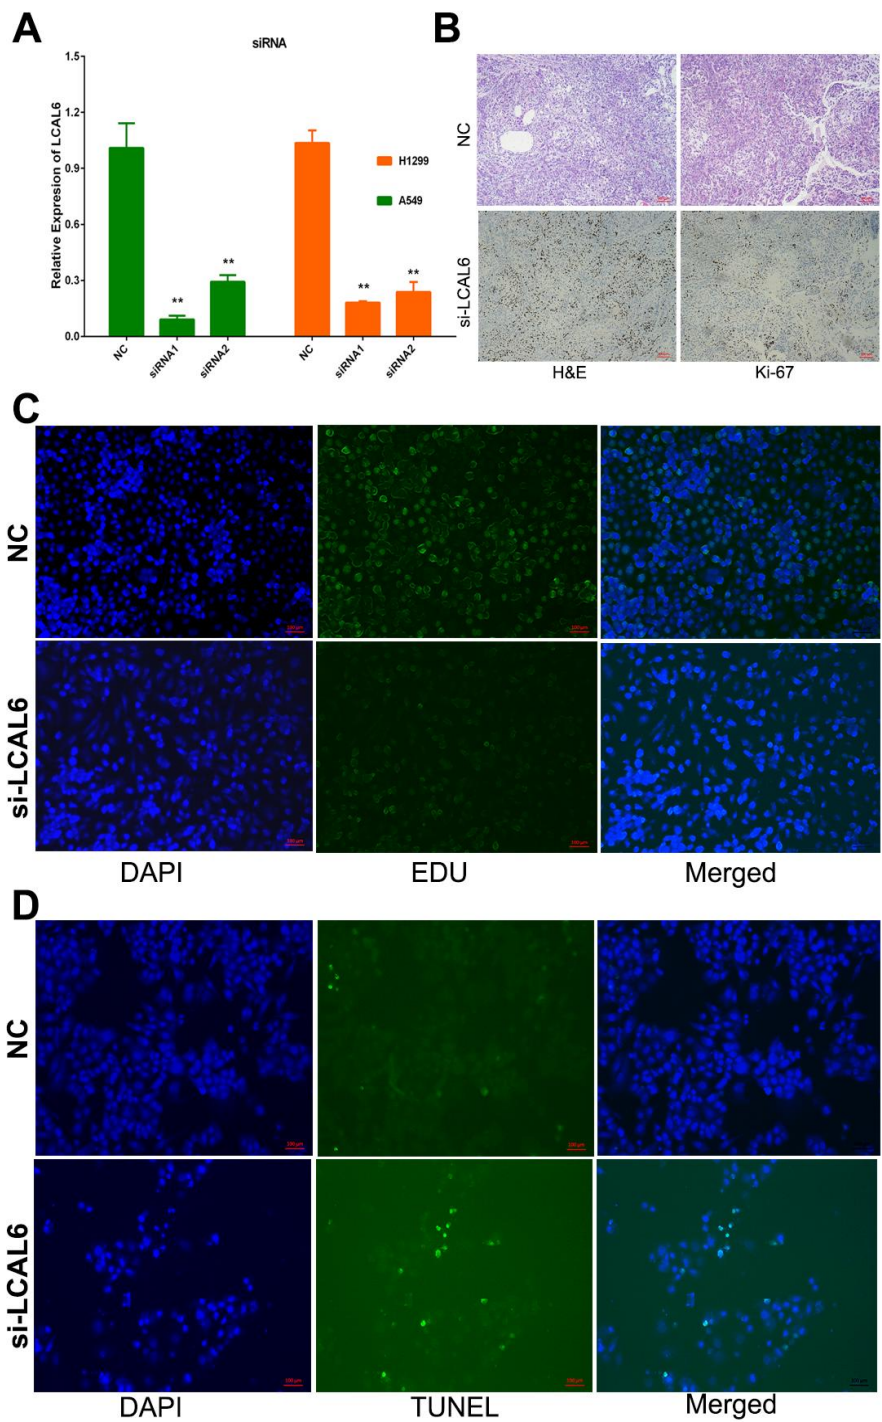

**Figure S6.** Two siRNAs efficiently silenced LCAL6 in A549 and H1299 cell lines (A).

Immunohistochemistry staining of Ki-67 was weaker in the xenograft tumors derived from A549 cells transfected with si-LCAL6 (B)

EdU assay showed silence of LCAL6 inhibited H1299 cell growth (C), and TUNEL assay showed apoptotic cells increased after silence of LCAL6 in H1299 cells (D).

**Table S7.** Clinical characteristics of lung cancer patients

**Table S8.** qRT-PCR primers and siRNA sequences
